# Supplementary material for: Burden of Pulmonary Rifampicin-Resistant Tuberculosis in Kajiado, Kenya: An Observational Study
Source: MDPI journal article supplement (doi:10.3390/microorganisms11051280), 2023-05-13
Supplement: s1 [file s1]

Figure S1. Map of the sites involved in the ATI-TB project

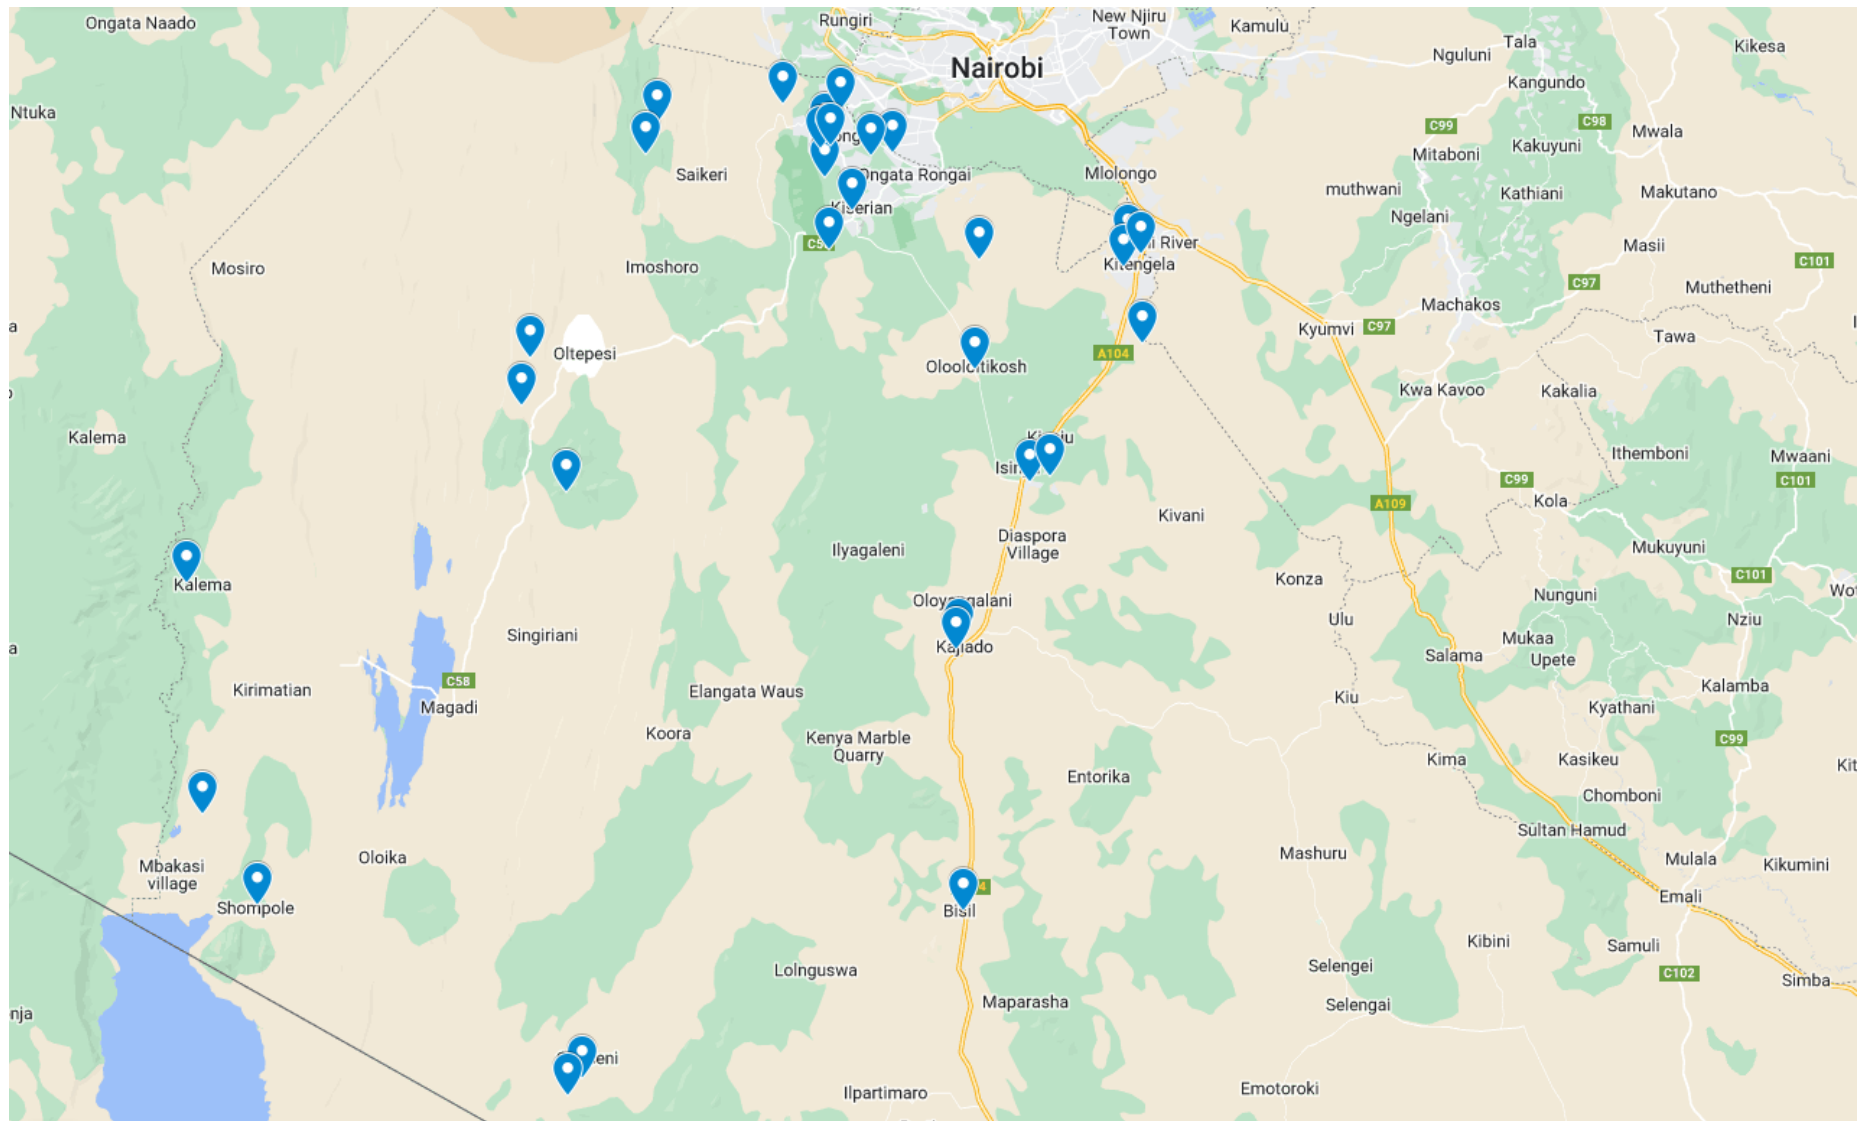

The communities involved in the “raising awareness and active case finding campaigns” are marked in blue. Two new Xpert MTB/RIF machines were also located in Ngong and Oltepesi and were available for routinely testing of *walk-in* patients.
