# Supplementary material for: Burden of Pulmonary Rifampicin-Resistant Tuberculosis in Kajiado, Kenya: An Observational Study
Source: MDPI journal article supplement (doi:10.3390/microorganisms11051280), 2023-05-13
Supplement: s1 [file s1]

TABLE S1. Kajiado County's demography and TB epidemiological data

| <b>Kajiado demographic data*</b>                                                |                                          |
|---------------------------------------------------------------------------------|------------------------------------------|
| Population                                                                      | 1,107,296                                |
| Population ≥15 ys                                                               | 646,661                                  |
| Annual population growth (estimates)                                            | 5.5%                                     |
| Subcounties population:                                                         |                                          |
| Kajiado North                                                                   | 304,404                                  |
| Kajiado East                                                                    | 271,576                                  |
| Kajiado Central                                                                 | 159,520                                  |
| Kajiado West                                                                    | 181,622                                  |
| Kajiado South                                                                   | 190,174                                  |
| Age distribution of the population (male:female ratio):                         |                                          |
| <15 ys                                                                          | 41.6% (1.02:1)                           |
| 15-24 ys                                                                        | 20.9% (0.85:1)                           |
| 25-34 ys                                                                        | 17.9% (1.04:1)                           |
| 35-44 ys                                                                        | 9.9% (1.18:1)                            |
| 45-54 ys                                                                        | 5.0% (1.16:1)                            |
| >54 ys                                                                          | 4.7% (1.02:1)                            |
| <b>Kajiado TB data from TIBU, June 2021 - May 2022<sup>^</sup></b>              |                                          |
| Total pulmonary TB incidence, all ages (bacteriologically+clinically diagnosed) | 108:100,000 population (1,331:1,232,448) |
| Pulmonary TB incidence, all ages (bacteriologically diagnosed)                  | 76:100,000 population (936:1,232,448)    |
| Total pulmonary TB incidence, ≥15 ys (bacteriologically+clinically diagnosed)   | 172:100,000 population (1,238:719,750)   |
| Pulmonary TB incidence, ≥15 ys (bacteriologically diagnosed)                    | 126:100,000 population (907:719,750)     |
| % Rifampicin resistance among pulmonary bacteriologically confirmed cases       | 1.0% (9:936)                             |
| % Rifampicin resistance among all pulmonary notified cases                      | 0.7% (9:1,331)                           |
| % of cases with HIV-coinfection                                                 | 23.4%                                    |
| <b>Kajiado TB data from TIBU, 2019<sup>^</sup></b>                              |                                          |
| Total pulmonary TB incidence, all ages (bacteriologically+clinically diagnosed) | 128:100,000 population (1,412:1,107,296) |
| Pulmonary TB incidence, all ages (bacteriologically diagnosed)                  | 88:100,000 population (976:1,107,296)    |
| Total pulmonary TB incidence, ≥15 ys (bacteriologically+clinically diagnosed)   | 201:100,000 population (1,301:646,661)   |
| Pulmonary TB incidence, ≥15 ys (bacteriologically diagnosed)                    | 146:100,000 population (945:646,661)     |
| % Rifampicin resistance among pulmonary bacteriologically confirmed cases       | 1.2% (12:976)                            |
| % Rifampicin resistance among all pulmonary notified cases                      | 0.8% (12:1,412)                          |
| % of cases with HIV-coinfection                                                 | 23.8%                                    |

\* Data shown are primarily derived from 2019 Kenya Population and Housing Census (reference 22 in the main text); annual population growth estimates and age distribution were not available from 2019 Census and are therefore derived from the County Integrated Development Plan 2018-2022 (reference 21 in the main text).

<sup>^</sup>The epidemiological variables reported here are inferred from data recorded in TIBU (National TB Reporting Platform), a platform developed by the Kenyan Ministry of Health (reference 23 in the main text).
