# Supplementary material for: Burden of Pulmonary Rifampicin-Resistant Tuberculosis in Kajiado, Kenya: An Observational Study
Source: Microorganisms. 2023 May 13;11(5):1280. doi: 10.3390/microorganisms11051280 (PMC10220680; doi:10.3390/microorganisms11051280)
Supplement: Supplementary file 1 [file microorganisms-11-01280-s001.zip › Table S2.xlsx]

## Sheet: PRESUMPTIVE CASES
Patient ID	Age (ys)	Sex (M/F)	Subcounty of origin	Identified by active case finding	GeneXpert result
1	50	M	K. WEST	Yes	Negative
2	45	M	K. WEST	Yes	Negative
3	30	F	K. WEST	Yes	Negative
4	54	F	K. WEST	Yes	Negative
5	43	M	K. WEST	Yes	Negative
6	23	M	K. WEST	Yes	Negative
7	30	F	K. WEST	Yes	Negative
8	62	F	K. WEST	Yes	Negative
9	30	F	K. WEST	Yes	Negative
10	54	F	K. WEST	Yes	Negative
11	50	F	K. WEST	Yes	Negative
12	51	F	K. WEST	Yes	Negative
13	72	F	K. WEST	Yes	Negative
14	12	M	K. WEST	Yes	Negative
15	50	F	K. WEST	Yes	Negative
16	55	F	K. WEST	Yes	Negative
17	30	F	K. WEST	Yes	Negative
18	29	F	K. WEST	Yes	Negative
19	26	F	K. WEST	Yes	Negative
20	70	F	K. WEST	Yes	Negative
21	70	F	K. WEST	Yes	Negative
22	50	F	K. NORTH	Yes	Negative
23	40	F	K. WEST	Yes	Negative
24	70	F	K. WEST	Yes	Negative
25	70	F	K. WEST	Yes	Negative
26	60	F	K. WEST	Yes	Negative
27	55	F	K. EAST	Yes	Negative
28	60	F	K. WEST	Yes	Negative
29	60	F	K. WEST	Yes	Negative
30	12	M	K. WEST	Yes	Negative
31	40	M	K. WEST	Yes	Negative
32	62	F	K. WEST	Yes	Negative
33	25	M	Unknown	No, walk-in patient	Negative
34	27	M	Unknown	No, walk-in patient	Negative
35	23	F	K. NORTH	Yes	Negative
36	56	M	K. NORTH	Yes	Negative
37	72	F	K. NORTH	Yes	Negative
38	59	M	K. WEST	Yes	Negative
39	45	F	K. WEST	Yes	Negative
40	29	F	Unknown	No, walk-in patient	Negative
41	57	M	K. NORTH	Yes	Negative
42	80	F	K. NORTH	Yes	Negative
43	49	F	K. NORTH	Yes	Negative
44	87	F	K. NORTH	Yes	Negative
45	17	F	K. NORTH	Yes	Negative
46	73	F	K. NORTH	Yes	Negative
47	47	F	K. NORTH	Yes	Negative
48	10	M	K. WEST	Yes	Negative
49	15	F	K. WEST	Yes	Negative
50	28	F	Unknown	No, walk-in patient	Negative
51	25	M	K. WEST	Yes	Invalid/Error
52	5	M	K. WEST	Yes	Negative
53	51	F	K. WEST	Yes	Negative
54	16	F	Unknown	Yes	Negative
55	72	M	Unknown	Yes	Negative
56	Unknown	F	K. WEST	Yes	Negative
57	Unknown	F	K. WEST	Yes	Negative
58	56	M	K. NORTH	Yes	Negative
59	45	M	K. NORTH	Yes	Negative
60	28	F	Unknown	No, walk-in patient	Negative
61	62	F	K. NORTH	Yes	Invalid/Error
62	46	M	Unknown	Yes	Invalid/Error
63	36	M	Unknown	Yes	Negative
64	4	F	Unknown	Yes	Negative
65	18	M	Unknown	Yes	Negative
66	25	M	Unknown	Yes	Negative
67	32	M	Unknown	Yes	Negative
68	40	F	Unknown	Yes	Negative
69	73	M	Unknown	Yes	Negative
70	Unknown	F	Unknown	Yes	Negative
71	80	M	Unknown	No, walk-in patient	Negative
72	Unknown	F	K. EAST	Yes	Negative
73	Unknown	M	K. EAST	Yes	Negative
74	Unknown	F	K. EAST	Yes	Negative
75	61	F	Unknown	Yes	Negative
76	60	F	Unknown	Yes	Negative
77	50	M	Unknown	Yes	Negative
78	24	F	Unknown	No, walk-in patient	Negative
79	33	M	Unknown	No, walk-in patient	Negative
80	43	M	Unknown	No, walk-in patient	Negative
81	41	F	K. WEST	No, walk-in patient	Negative
82	Unknown	F	K. EAST	Yes	Negative
83	Unknown	F	K. EAST	Yes	Negative
84	24	F	Unknown	Yes	Negative
85	17	F	K. EAST	Yes	Negative
86	30	F	K. EAST	Yes	Negative
87	21	M	K. EAST	Yes	Negative
88	35	F	K. EAST	Yes	Negative
89	50	F	K. NORTH	Yes	Negative
90	49	F	K. NORTH	Yes	Negative
91	32	F	K. NORTH	Yes	Negative
92	51	F	K. NORTH	Yes	Negative
93	54	M	K. NORTH	Yes	Negative
94	76	F	Unknown	No, walk-in patient	Negative
95	70	F	K. EAST	No, walk-in patient	Positive
96	45	F	K. WEST	Yes	Negative
97	55	F	K. WEST	Yes	Negative
98	20	F	K. WEST	Yes	Negative
99	17	M	K. WEST	Yes	Negative
100	60	F	Unknown	No, walk-in patient	Negative
101	32	F	Unknown	No, walk-in patient	Negative
102	81	M	K. NORTH	No, walk-in patient	Negative
103	36	M	K. NORTH	No, walk-in patient	Negative
104	58	F	K. NORTH	No, walk-in patient	Negative
105	33	F	K. WEST	No, walk-in patient	Negative
106	71	F	K. WEST	No, walk-in patient	Negative
107	Unknown	F	K. WEST	Yes	Negative
108	38	M	K. WEST	Yes	Negative
109	60	F	K. WEST	No, walk-in patient	Negative
110	42	M	K. EAST	Yes	Negative
111	25	F	K. EAST	Yes	Negative
112	28	M	K. EAST	Yes	Negative
113	30	F	K. EAST	Yes	Negative
114	58	M	K. WEST	No, walk-in patient	Positive
115	34	F	K. WEST	No, walk-in patient	Positive
116	30	F	K. EAST	Yes	Negative
117	33	M	K. EAST	Yes	Negative
118	47	M	K. EAST	Yes	Negative
119	49	M	K. EAST	Yes	Negative
120	18	F	K. EAST	Yes	Negative
121	Unknown	M	Unknown	No, walk-in patient	Negative
122	40	M	K. WEST	No, walk-in patient	Negative
123	24	F	K. WEST	No, walk-in patient	Negative
124	16	F	K. WEST	No, walk-in patient	Negative
125	41	F	K. WEST	No, walk-in patient	Negative
126	51	M	K. WEST	No, walk-in patient	Positive
127	23	M	K. WEST	No, walk-in patient	Negative
128	12	F	K. WEST	No, walk-in patient	Negative
129	21	F	K. WEST	No, walk-in patient	Negative
130	42	F	K. WEST	No, walk-in patient	Negative
131	58	F	K. NORTH	No, walk-in patient	Negative
132	53	M	K. WEST	No, walk-in patient	Negative
133	7	F	K. WEST	No, walk-in patient	Negative
134	38	F	K. WEST	No, walk-in patient	Negative
135	40	M	Unknown	No, walk-in patient	Negative
136	25	F	K. WEST	Yes	Negative
137	60	F	K. WEST	Yes	Negative
138	40	F	K. NORTH	Yes	Negative
139	19	M	K. NORTH	Yes	Negative
140	17	M	K. NORTH	Yes	Negative
141	18	F	K. NORTH	Yes	Negative
142	68	F	K. NORTH	Yes	Negative
143	12	F	K. NORTH	No, walk-in patient	Negative
144	Unknown	M	Unknown	No, walk-in patient	Negative
145	74	M	K. EAST	Yes	Positive
146	26	F	K. WEST	Yes	Negative
147	25	M	Unknown	No, walk-in patient	Negative
148	30	M	Unknown	No, walk-in patient	Negative
149	23	M	K. WEST	No, walk-in patient	Negative
150	30	M	K. WEST	No, walk-in patient	Negative
151	14	F	K. WEST	No, walk-in patient	Negative
152	34	F	K. WEST	No, walk-in patient	Negative
153	54	M	Unknown	No, walk-in patient	Negative
154	48	M	K. WEST	No, walk-in patient	Negative
155	14	M	K. WEST	No, walk-in patient	Negative
156	20	F	K. WEST	No, walk-in patient	Negative
157	38	F	K. WEST	No, walk-in patient	Negative
158	20	M	K. WEST	No, walk-in patient	Positive
159	28	M	K. WEST	No, walk-in patient	Negative
160	40	M	K. WEST	No, walk-in patient	Negative
161	40	M	K. NORTH	No, walk-in patient	Negative
162	45	F	K. NORTH	No, walk-in patient	Negative
163	24	F	K. WEST	Yes	Negative
164	67	F	K. WEST	No, walk-in patient	Negative
165	12	F	K. WEST	No, walk-in patient	Negative
166	40	M	K. WEST	No, walk-in patient	Negative
167	21	M	K. WEST	No, walk-in patient	Positive
168	15	M	K. WEST	No, walk-in patient	Negative
169	33	F	K. WEST	No, walk-in patient	Negative
170	60	M	K. WEST	No, walk-in patient	Negative
171	43	M	K. EAST	Yes	Negative
172	65	F	K. WEST	No, walk-in patient	Negative
173	17	M	K. WEST	No, walk-in patient	Negative
174	45	M	K. EAST	Yes	Negative
175	24	M	K. EAST	Yes	Negative
176	42	M	K. EAST	Yes	Negative
177	60	M	K. EAST	Yes	Negative
178	24	F	K. EAST	Yes	Negative
179	28	M	K. WEST	Yes	Negative
180	42	M	K. WEST	Yes	Negative
181	16	F	K. WEST	No, walk-in patient	Negative
182	34	M	Unknown	No, walk-in patient	Negative
183	Unknown	M	K. WEST	No, walk-in patient	Negative
184	49	F	K. NORTH	Yes	Negative
185	18	F	K. WEST	No, walk-in patient	Positive
186	30	F	K. WEST	No, walk-in patient	Negative
187	30	F	K. WEST	Yes	Negative
188	30	M	K. WEST	Yes	Negative
189	30	F	K. WEST	Yes	Negative
190	14	F	K. WEST	Yes	Negative
191	Unknown	F	K. WEST	Yes	Negative
192	35	F	K. WEST	No, walk-in patient	Positive
193	Unknown	F	K. WEST	No, walk-in patient	Negative
194	41	M	K. WEST	No, walk-in patient	Negative
195	8	F	K. WEST	No, walk-in patient	Negative
196	19	M	K. WEST	No, walk-in patient	Negative
197	6	F	K. WEST	No, walk-in patient	Negative
198	32	F	K. WEST	No, walk-in patient	Negative
199	36	F	K. WEST	No, walk-in patient	Negative
200	60	M	K. WEST	No, walk-in patient	Negative
201	40	F	K. WEST	No, walk-in patient	Negative
202	17	M	K. WEST	No, walk-in patient	Negative
203	61	F	K. WEST	No, walk-in patient	Negative
204	20	F	K. WEST	No, walk-in patient	Negative
205	Unknown	F	K. WEST	No, walk-in patient	Negative
206	12	M	K. WEST	No, walk-in patient	Negative
207	32	M	Unknown	No, walk-in patient	Negative
208	18	F	K. WEST	No, walk-in patient	Positive
209	30	F	K. WEST	No, walk-in patient	Negative
210	20	F	K. WEST	No, walk-in patient	Negative
211	53	F	K. WEST	No, walk-in patient	Negative
212	32	M	Unknown	No, walk-in patient	Negative
213	Unknown	M	K. WEST	No, walk-in patient	Negative
214	8	F	K. WEST	No, walk-in patient	Negative
215	12	M	K. WEST	No, walk-in patient	Negative
216	Unknown	F	K. WEST	No, walk-in patient	Negative
217	55	F	K. WEST	No, walk-in patient	Negative
218	42	F	K. WEST	No, walk-in patient	Negative
219	23	F	K. WEST	Yes	Negative
220	Unknown	M	K. WEST	Yes	Negative
221	51	F	K. WEST	Yes	Negative
222	34	F	K. WEST	No, walk-in patient	Positive
223	33	F	K. WEST	No, walk-in patient	Negative
224	25	F	K. WEST	No, walk-in patient	Positive
225	Unknown	M	K. WEST	No, walk-in patient	Negative
226	35	F	K. WEST	No, walk-in patient	Negative
227	28	M	K. WEST	No, walk-in patient	Negative
228	50	F	K. WEST	No, walk-in patient	Negative
229	70	F	K. WEST	Yes	Negative
230	14	M	K. WEST	No, walk-in patient	Negative
231	42	F	K. WEST	No, walk-in patient	Negative
232	49	M	K. WEST	No, walk-in patient	Negative
233	10	M	K. WEST	No, walk-in patient	Negative
234	40	F	K. NORTH	Yes	Negative
235	56	M	K. NORTH	Yes	Negative
236	61	M	K. NORTH	Yes	Negative
237	85	M	K. NORTH	Yes	Negative
238	64	M	K. NORTH	Yes	Negative
239	30	F	K. NORTH	Yes	Negative
240	28	F	K. NORTH	Yes	Negative
241	42	M	K. NORTH	Yes	Negative
242	30	M	K. WEST	No, walk-in patient	Positive
243	40	F	K. WEST	No, walk-in patient	Negative
244	19	F	K. WEST	No, walk-in patient	Negative
245	23	F	K. WEST	No, walk-in patient	Negative
246	Unknown	F	K. WEST	No, walk-in patient	Negative
247	3	F	K. WEST	No, walk-in patient	Negative
248	56	F	K. WEST	No, walk-in patient	Negative
249	49	M	Unknown	No, walk-in patient	Negative
250	14	F	K. WEST	No, walk-in patient	Negative
251	Unknown	M	K. WEST	No, walk-in patient	Negative
252	35	F	K. WEST	No, walk-in patient	Negative
253	16	F	Unknown	Yes	Negative
254	6	F	K. NORTH	Yes	Negative
255	13	F	K. NORTH	Yes	Positive
256	25	M	K. EAST	Yes	Negative
257	15	M	K. WEST	No, walk-in patient	Negative
258	56	F	K. WEST	No, walk-in patient	Negative
259	46	F	K. WEST	No, walk-in patient	Negative
260	Unknown	F	K. WEST	No, walk-in patient	Negative
261	15	M	K. EAST	Yes	Negative
262	33	F	K. EAST	Yes	Negative
263	28	M	K. EAST	Yes	Negative
264	40	F	K. EAST	Yes	Negative
265	29	M	K. NORTH	No, walk-in patient	Positive
266	52	F	K. EAST	Yes	Negative
267	28	M	Unknown	No, walk-in patient	Negative
268	14	M	K. WEST	Yes	Negative
269	14	F	K. WEST	Yes	Negative
270	10	F	K. WEST	Yes	Negative
271	36	F	K. WEST	Yes	Negative
272	8	M	K. WEST	Yes	Negative
273	17	M	K. WEST	Yes	Negative
274	9	M	K. WEST	Yes	Negative
275	48	F	K. WEST	Yes	Negative
276	28	M	K. WEST	Yes	Negative
277	33	M	K. WEST	Yes	Negative
278	26	M	K. WEST	Yes	Positive
279	34	F	K. WEST	No, walk-in patient	Negative
280	22	F	K. WEST	No, walk-in patient	Negative
281	9	F	K. WEST	No, walk-in patient	Negative
282	60	F	K. WEST	No, walk-in patient	Negative
283	35	M	K. NORTH	Yes	Negative
284	6	F	K. NORTH	Yes	Negative
285	16	F	K. WEST	No, walk-in patient	Negative
286	65	F	K. WEST	No, walk-in patient	Negative
287	53	F	K. WEST	No, walk-in patient	Negative
288	39	F	K. WEST	Yes	Negative
289	65	F	K. WEST	No, walk-in patient	Positive
290	39	F	K. EAST	Yes	Negative
291	Unknown	M	Unknown	Yes	Negative
292	42	F	K. WEST	No, walk-in patient	Negative
293	42	F	K. WEST	No, walk-in patient	Negative
294	42	M	K. WEST	No, walk-in patient	Negative
295	84	F	K. WEST	No, walk-in patient	Negative
296	60	F	K. WEST	No, walk-in patient	Positive
297	42	M	K. CENTRAL	Yes	Negative
298	36	M	K. CENTRAL	Yes	Negative
299	34	F	K. CENTRAL	Yes	Negative
300	Unknown	F	Unknown	Yes	Negative
301	Unknown	M	Unknown	Yes	Negative
302	Unknown	F	Unknown	Yes	Negative
303	64	M	K. CENTRAL	Yes	Negative
304	13	M	K. CENTRAL	Yes	Negative
305	46	M	K. CENTRAL	Yes	Negative
306	35	F	K. CENTRAL	Yes	Negative
307	25	F	K. CENTRAL	Yes	Negative
308	45	M	K. CENTRAL	Yes	Negative
309	53	F	K. CENTRAL	Yes	Negative
310	35	F	K. CENTRAL	Yes	Negative
311	22	F	K. CENTRAL	Yes	Positive
312	61	M	K. CENTRAL	Yes	Positive
313	64	F	K. WEST	No, walk-in patient	Negative
314	10	F	K. WEST	No, walk-in patient	Negative
315	Unknown	M	K. WEST	No, walk-in patient	Negative
316	37	F	K. WEST	No, walk-in patient	Negative
317	10	M	K. WEST	No, walk-in patient	Negative
318	60	M	K. WEST	No, walk-in patient	Negative
319	28	F	Unknown	No, walk-in patient	Negative
320	42	M	K. WEST	No, walk-in patient	Negative
321	28	F	K. WEST	Yes	Negative
322	31	F	K. WEST	Yes	Negative
323	40	F	K. WEST	Yes	Negative
324	9	M	K. WEST	Yes	Negative
325	47	M	K. WEST	Yes	Negative
326	5	F	K. WEST	Yes	Negative
327	61	M	K. WEST	Yes	Negative
328	58	F	K. WEST	Yes	Negative
329	50	F	K. WEST	Yes	Negative
330	26	M	K. WEST	Yes	Negative
331	6	F	K. WEST	Yes	Negative
332	60	M	K. WEST	Yes	Negative
333	60	F	K. WEST	Yes	Negative
334	32	F	K. WEST	Yes	Negative
335	37	F	K. WEST	Yes	Negative
336	8	M	K. WEST	Yes	Negative
337	43	M	K. WEST	Yes	Negative
338	67	F	K. WEST	Yes	Negative
339	10	F	K. WEST	Yes	Negative
340	60	F	K. WEST	Yes	Negative
341	8	F	K. WEST	Yes	Negative
342	34	M	K. WEST	No, walk-in patient	Positive
343	24	F	K. WEST	No, walk-in patient	Negative
344	13	M	K. WEST	No, walk-in patient	Negative
345	45	F	Unknown	No, walk-in patient	Negative
346	13	M	K. EAST	Yes	Negative
347	Unknown	F	K. EAST	Yes	Negative
348	26	M	K. EAST	Yes	Invalid/Error
349	45	F	K. WEST	No, walk-in patient	Negative
350	27	F	K. WEST	No, walk-in patient	Negative
351	65	F	K. WEST	No, walk-in patient	Negative
352	73	M	K. WEST	No, walk-in patient	Negative
353	10	F	K. WEST	No, walk-in patient	Negative
354	40	F	K. WEST	No, walk-in patient	Negative
355	16	M	K. WEST	No, walk-in patient	Negative
356	75	M	K. WEST	No, walk-in patient	Negative
357	32	M	K. EAST	Yes	Negative
358	46	M	K. EAST	Yes	Negative
359	27	M	K. EAST	Yes	Negative
360	22	F	K. EAST	Yes	Negative
361	20	F	K. EAST	Yes	Negative
362	20	F	K. EAST	Yes	Negative
363	21	F	K. EAST	Yes	Negative
364	53	M	K. EAST	Yes	Negative
365	45	F	K. EAST	Yes	Negative
366	29	F	K. EAST	Yes	Negative
367	61	F	Unknown	No, walk-in patient	Negative
368	38	F	K. WEST	Yes	Negative
369	29	F	K. WEST	Yes	Negative
370	78	F	K. WEST	Yes	Negative
371	16	M	K. WEST	Yes	Negative
372	45	F	K. WEST	Yes	Negative
373	49	M	K. WEST	Yes	Positive
374	36	F	K. WEST	No, walk-in patient	Negative
375	13	F	K. WEST	No, walk-in patient	Negative
376	6	M	K. WEST	No, walk-in patient	Negative
377	10	F	K. WEST	No, walk-in patient	Negative
378	38	F	K. WEST	No, walk-in patient	Negative
379	50	F	K. WEST	No, walk-in patient	Negative
380	14	F	K. WEST	No, walk-in patient	Negative
381	30	M	K. WEST	No, walk-in patient	Negative
382	10	M	K. WEST	No, walk-in patient	Negative
383	47	M	K. WEST	Yes	Negative
384	48	F	K. NORTH	Yes	Negative
385	70	F	K. NORTH	Yes	Negative
386	34	F	K. WEST	No, walk-in patient	Negative
387	70	M	K. WEST	No, walk-in patient	Negative
388	6	F	K. WEST	No, walk-in patient	Negative
389	60	M	K. WEST	No, walk-in patient	Negative
390	21	M	K. WEST	No, walk-in patient	Negative
391	21	M	K. WEST	No, walk-in patient	Negative
392	18	M	K. WEST	No, walk-in patient	Negative
393	68	M	K. WEST	Yes	Negative
394	16	F	K. WEST	Yes	Negative
395	39	M	K. WEST	Yes	Negative
396	9	M	K. WEST	No, walk-in patient	Positive
397	72	F	K. NORTH	Yes	Negative
398	5	F	K. WEST	No, walk-in patient	Negative
399	15	M	K. WEST	No, walk-in patient	Negative
400	3	M	K. WEST	No, walk-in patient	Negative
401	40	F	K. WEST	No, walk-in patient	Negative
402	35	M	K. NORTH	Yes	Negative
403	61	F	K. NORTH	Yes	Negative
404	60	F	K. NORTH	Yes	Negative
405	54	F	K. NORTH	Yes	Negative
406	62	F	K. NORTH	No, walk-in patient	Negative
407	49	M	K. WEST	No, walk-in patient	Positive
408	43	M	K. EAST	No, walk-in patient	Positive
409	34	F	K. NORTH	No, walk-in patient	Positive
410	19	F	K. WEST	No, walk-in patient	Negative
411	16	F	K. WEST	No, walk-in patient	Negative
412	80	M	K. WEST	No, walk-in patient	Negative
413	24	F	K. WEST	No, walk-in patient	Negative
414	46	F	K. WEST	No, walk-in patient	Negative
415	33	F	K. WEST	No, walk-in patient	Negative
416	31	M	K. NORTH	Yes	Negative
417	52	M	K. WEST	No, walk-in patient	Negative
418	20	F	K. WEST	No, walk-in patient	Negative
419	56	M	K. WEST	No, walk-in patient	Positive
420	56	F	K. WEST	No, walk-in patient	Positive
421	56	M	K. WEST	Yes	Negative
422	45	M	K. WEST	Yes	Negative
423	32	F	K. WEST	Yes	Negative
424	52	F	K. WEST	No, walk-in patient	Negative
425	41	F	K. WEST	No, walk-in patient	Negative
426	28	M	K. WEST	No, walk-in patient	Negative
427	Unknown	F	K. WEST	No, walk-in patient	Negative
428	36	F	K. WEST	Yes	Negative
429	35	M	K. WEST	No, walk-in patient	Positive
430	45	F	K. WEST	No, walk-in patient	Positive
431	11	F	K. WEST	No, walk-in patient	Negative
432	15	M	K. WEST	No, walk-in patient	Negative
433	11	F	K. WEST	No, walk-in patient	Negative
434	50	F	K. WEST	No, walk-in patient	Negative
435	62	M	K. WEST	No, walk-in patient	Negative
436	38	F	K. NORTH	Yes	Negative
437	19	F	K. NORTH	Yes	Negative
438	34	M	K. NORTH	Yes	Negative
439	52	F	K. NORTH	Yes	Negative
440	26	M	K. WEST	No, walk-in patient	Positive
441	28	F	K. WEST	No, walk-in patient	Invalid/Error
442	27	F	K. WEST	No, walk-in patient	Negative
443	75	M	K. WEST	No, walk-in patient	Negative
444	33	M	K. NORTH	No, walk-in patient	Negative
445	48	M	K. WEST	No, walk-in patient	Negative
446	26	F	K. WEST	No, walk-in patient	Negative
447	35	F	K. WEST	No, walk-in patient	Negative
448	45	F	K. WEST	No, walk-in patient	Negative
449	23	F	K. WEST	No, walk-in patient	Negative
450	40	M	K. WEST	No, walk-in patient	Negative
451	80	M	K. WEST	No, walk-in patient	Negative
452	63	M	K. NORTH	Yes	Negative
453	74	F	K. NORTH	Yes	Negative
454	72	F	K. NORTH	Yes	Negative
455	27	M	K. NORTH	Yes	Negative
456	28	F	K. NORTH	Yes	Positive
457	39	F	K. WEST	No, walk-in patient	Negative
458	22	F	K. WEST	No, walk-in patient	Negative
459	15	M	K. WEST	No, walk-in patient	Negative
460	50	F	K. WEST	No, walk-in patient	Negative
461	41	F	K. WEST	No, walk-in patient	Negative
462	10	M	K. WEST	No, walk-in patient	Negative
463	26	M	K. WEST	Yes	Negative
464	30	F	K. WEST	Yes	Negative
465	45	F	K. WEST	Yes	Negative
466	14	F	K. WEST	Yes	Negative
467	45	M	K. WEST	No, walk-in patient	Positive
468	5	M	K. WEST	No, walk-in patient	Negative
469	25	F	K. WEST	No, walk-in patient	Negative
470	26	F	K. NORTH	No, walk-in patient	Negative
471	40	F	K. WEST	No, walk-in patient	Negative
472	30	F	K. WEST	No, walk-in patient	Negative
473	31	F	K. WEST	No, walk-in patient	Negative
474	36	F	K. WEST	No, walk-in patient	Negative
475	34	M	K. WEST	No, walk-in patient	Positive
476	21	M	K. WEST	No, walk-in patient	Negative
477	8	F	K. WEST	No, walk-in patient	Negative
478	21	F	K. NORTH	Yes	Negative
479	54	F	K. NORTH	Yes	Negative
480	60	F	K. NORTH	Yes	Negative
481	23	F	K. NORTH	Yes	Negative
482	40	M	K. NORTH	No, walk-in patient	Negative
483	32	M	K. WEST	No, walk-in patient	Positive
484	32	M	K. NORTH	No, walk-in patient	Positive
485	Unknown	F	K. WEST	No, walk-in patient	Negative
486	35	F	K. EAST	Yes	Negative
487	43	M	K. EAST	Yes	Negative
488	27	M	K. EAST	Yes	Negative
489	15	M	K. WEST	No, walk-in patient	Positive
490	56	F	K. WEST	No, walk-in patient	Negative
491	42	F	K. WEST	No, walk-in patient	Negative
492	14	F	K. EAST	Yes	Negative
493	50	F	K. EAST	Yes	Negative
494	28	F	K. WEST	Yes	Negative
495	14	F	K. WEST	No, walk-in patient	Negative
496	62	M	K. NORTH	No, walk-in patient	Negative
497	14	M	K. NORTH	No, walk-in patient	Negative
498	53	M	K. WEST	Yes	Invalid/Error
499	58	M	K. WEST	No, walk-in patient	Negative
500	15	M	K. WEST	No, walk-in patient	Negative
501	13	M	K. WEST	No, walk-in patient	Negative
502	Unknown	F	K. WEST	Yes	Negative
503	Unknown	M	K. WEST	Yes	Negative
504	9	F	K. WEST	Yes	Negative
505	61	M	K. WEST	No, walk-in patient	Negative
506	30	F	K. WEST	No, walk-in patient	Negative
507	30	M	K. WEST	No, walk-in patient	Negative
508	7	F	K. WEST	No, walk-in patient	Negative
509	11	M	K. WEST	No, walk-in patient	Negative
510	21	F	K. WEST	No, walk-in patient	Negative
511	21	F	K. WEST	No, walk-in patient	Negative
512	28	F	K. WEST	Yes	Negative
513	20	F	K. WEST	Yes	Negative
514	7	F	K. WEST	Yes	Negative
515	26	M	K. WEST	Yes	Negative
516	Unknown	M	K. WEST	Yes	Negative
517	45	M	K. NORTH	Yes	Negative
518	39	M	K. NORTH	Yes	Negative
519	61	M	K. NORTH	Yes	Negative
520	28	M	K. NORTH	Yes	Negative
521	30	M	K. NORTH	Yes	Negative
522	35	M	K. WEST	No, walk-in patient	Negative
523	30	M	K. WEST	No, walk-in patient	Negative
524	4	F	K. WEST	No, walk-in patient	Negative
525	85	M	K. WEST	No, walk-in patient	Negative
526	30	M	K. NORTH	Yes	Negative
527	40	M	K. NORTH	Yes	Negative
528	45	M	K. NORTH	Yes	Negative
529	15	M	K. WEST	No, walk-in patient	Negative
530	80	M	K. WEST	Yes	Negative
531	10	F	K. WEST	Yes	Negative
532	67	F	K. WEST	Yes	Negative
533	30	M	Unknown	No, walk-in patient	Negative
534	28	F	K. WEST	Yes	Negative
535	30	M	K. WEST	Yes	Negative
536	33	M	K. NORTH	No, walk-in patient	Positive
537	49	M	K. WEST	No, walk-in patient	Negative
538	52	F	K. WEST	No, walk-in patient	Negative
539	70	F	K. NORTH	Yes	Negative
540	23	M	K. WEST	No, walk-in patient	Negative
541	23	M	K. NORTH	No, walk-in patient	Positive
542	Unknown	M	Unknown	No, walk-in patient	Negative
543	16	F	K. NORTH	Yes	Negative
544	48	F	K. NORTH	Yes	Negative
545	54	M	K. NORTH	Yes	Negative
546	63	M	Unknown	No, walk-in patient	Negative
547	52	F	K. NORTH	Yes	Negative
548	Unknown	F	Unknown	No, walk-in patient	Negative
549	29	F	K. WEST	No, walk-in patient	Negative
550	68	M	K. EAST	Yes	Negative
551	Unknown	F	Unknown	No, walk-in patient	Negative
552	40	F	K. EAST	Yes	Negative
553	30	F	K. NORTH	Yes	Negative
554	42	F	K. NORTH	Yes	Negative
555	48	M	K. NORTH	Yes	Negative
556	73	M	K. WEST	No, walk-in patient	Negative
557	51	M	K. WEST	No, walk-in patient	Negative
558	10	M	K. WEST	Yes	Negative
559	60	F	K. WEST	Yes	Negative
560	8	M	K. WEST	Yes	Negative
561	48	F	K. WEST	Yes	Negative
562	49	F	K. WEST	Yes	Positive
563	63	M	K. WEST	Yes	Negative
564	36	F	K. WEST	Yes	Negative
565	46	M	K. WEST	Yes	Negative
566	Unknown	M	K. NORTH	Yes	Negative
567	29	F	K. NORTH	Yes	Negative
568	52	F	K. WEST	No, walk-in patient	Invalid/Error
569	43	M	K. NORTH	Yes	Negative
570	49	M	K. NORTH	Yes	Negative
571	60	M	K. WEST	No, walk-in patient	Positive
572	35	F	K. WEST	No, walk-in patient	Negative
573	Unknown	F	K. WEST	Yes	Negative
574	7	M	K. WEST	Yes	Negative
575	31	F	K. WEST	Yes	Negative
576	41	F	K. WEST	No, walk-in patient	Positive
577	38	F	K. NORTH	No, walk-in patient	Negative
578	36	F	K. WEST	No, walk-in patient	Negative
579	35	F	K. WEST	No, walk-in patient	Negative
580	31	M	K. WEST	No, walk-in patient	Negative
581	40	M	K. NORTH	Yes	Negative
582	20	F	K. NORTH	Yes	Negative
583	71	F	K. NORTH	Yes	Negative
584	Unknown	F	K. WEST	No, walk-in patient	Negative
585	31	F	K. WEST	No, walk-in patient	Negative
586	15	F	K. WEST	No, walk-in patient	Negative
587	19	M	K. WEST	No, walk-in patient	Negative
588	36	F	K. NORTH	No, walk-in patient	Negative
589	25	M	K. NORTH	Yes	Positive
590	40	F	K. NORTH	Yes	Negative
591	24	F	K. NORTH	Yes	Negative
592	30	F	K. WEST	No, walk-in patient	Negative
593	31	F	K. WEST	No, walk-in patient	Negative
594	38	M	K. WEST	No, walk-in patient	Negative
595	18	M	K. WEST	No, walk-in patient	Negative
596	35	F	K. WEST	No, walk-in patient	Negative
597	16	M	K. WEST	No, walk-in patient	Negative
598	37	M	K. WEST	No, walk-in patient	Negative
599	29	F	K. WEST	No, walk-in patient	Negative
600	21	F	K. WEST	No, walk-in patient	Negative
601	30	M	K. WEST	No, walk-in patient	Negative
602	35	F	K. WEST	No, walk-in patient	Negative
603	26	M	K. WEST	No, walk-in patient	Negative
604	24	M	K. WEST	No, walk-in patient	Negative
605	24	M	K. WEST	No, walk-in patient	Positive
606	50	M	K. NORTH	No, walk-in patient	Positive
607	68	F	K. WEST	No, walk-in patient	Invalid/Error
608	27	M	K. WEST	No, walk-in patient	Negative
609	21	F	K. WEST	No, walk-in patient	Negative
610	20	M	K. WEST	No, walk-in patient	Negative
611	35	F	K. WEST	No, walk-in patient	Negative
612	17	M	K. WEST	No, walk-in patient	Negative
613	32	F	K. WEST	No, walk-in patient	Negative
614	16	M	K. WEST	No, walk-in patient	Negative
615	68	F	K. WEST	No, walk-in patient	Negative
616	34	F	K. WEST	Yes	Negative
617	38	F	K. WEST	Yes	Negative
618	54	M	K. WEST	Yes	Negative
619	48	F	K. WEST	Yes	Negative
620	62	F	K. WEST	Yes	Negative
621	29	F	K. WEST	No, walk-in patient	Negative
622	40	M	K. WEST	No, walk-in patient	Negative
623	50	F	K. WEST	No, walk-in patient	Negative
624	49	M	K. WEST	Yes	Positive
625	Unknown	M	K. WEST	No, walk-in patient	Negative
626	41	F	K. WEST	No, walk-in patient	Negative
627	36	M	K. WEST	No, walk-in patient	Negative
628	22	M	Unknown	No, walk-in patient	Negative
629	30	M	K. WEST	No, walk-in patient	Negative
630	26	F	K. WEST	No, walk-in patient	Negative
631	16	F	K. EAST	Yes	Negative
632	64	F	K. EAST	Yes	Negative
633	15	M	K. WEST	No, walk-in patient	Negative
634	18	M	K. WEST	No, walk-in patient	Negative
635	15	M	K. WEST	No, walk-in patient	Negative
636	16	M	K. WEST	No, walk-in patient	Negative
637	24	M	K. WEST	No, walk-in patient	Negative
638	24	F	K. WEST	No, walk-in patient	Negative
639	48	M	K. WEST	No, walk-in patient	Positive
640	39	F	K. WEST	Yes	Negative
641	Unknown	F	K. WEST	Yes	Negative
642	Unknown	M	K. WEST	Yes	Negative
643	Unknown	F	K. WEST	Yes	Negative
644	58	M	K. WEST	Yes	Negative
645	59	M	K. WEST	Yes	Negative
646	Unknown	M	K. WEST	Yes	Invalid/Error
647	Unknown	F	K. WEST	Yes	Invalid/Error
648	Unknown	F	K. WEST	Yes	Negative
649	Unknown	M	K. WEST	Yes	Negative
650	86	M	K. WEST	Yes	Negative
651	85	F	K. WEST	Yes	Negative
652	Unknown	F	K. WEST	Yes	Negative
653	23	M	K. WEST	Yes	Negative
654	65	M	K. WEST	Yes	Negative
655	25	M	K. WEST	Yes	Positive
656	50	F	K. WEST	No, walk-in patient	Negative
657	26	F	K. WEST	No, walk-in patient	Negative
658	14	F	K. WEST	No, walk-in patient	Negative
659	8	M	K. WEST	No, walk-in patient	Negative
660	60	M	K. WEST	No, walk-in patient	Negative
661	8	M	K. WEST	No, walk-in patient	Negative
662	26	M	K. WEST	No, walk-in patient	Negative
663	14	M	K. WEST	No, walk-in patient	Negative
664	60	M	K. NORTH	Yes	Negative
665	31	F	K. NORTH	Yes	Negative
666	44	F	K. NORTH	Yes	Negative
667	32	F	K. NORTH	Yes	Negative
668	27	M	K. WEST	No, walk-in patient	Negative
669	Unknown	M	K. WEST	No, walk-in patient	Negative
670	15	M	K. WEST	No, walk-in patient	Positive
671	62	M	K. WEST	No, walk-in patient	Negative
672	50	F	K. WEST	No, walk-in patient	Negative
673	17	F	K. WEST	Yes	Negative
674	12	M	K. WEST	No, walk-in patient	Negative
675	31	F	K. WEST	No, walk-in patient	Negative
676	21	F	K. WEST	No, walk-in patient	Positive
677	38	M	K. WEST	No, walk-in patient	Negative
678	73	M	K. WEST	No, walk-in patient	Negative
679	13	M	K. WEST	No, walk-in patient	Negative
680	25	M	K. WEST	No, walk-in patient	Positive
681	48	F	K. WEST	No, walk-in patient	Negative
682	21	F	K. WEST	No, walk-in patient	Negative
683	26	F	K. WEST	No, walk-in patient	Negative
684	14	F	K. EAST	Yes	Negative
685	50	F	K. EAST	Yes	Negative
686	27	M	K. WEST	No, walk-in patient	Positive
687	60	F	K. WEST	No, walk-in patient	Negative
688	22	F	K. WEST	Yes	Negative
689	28	F	K. WEST	Yes	Negative
690	52	F	K. WEST	Yes	Negative
691	32	M	K. WEST	Yes	Negative
692	32	M	K. WEST	Yes	Negative
693	52	F	K. WEST	No, walk-in patient	Negative
694	25	F	K. NORTH	Yes	Negative
695	30	F	K. NORTH	Yes	Negative
696	38	F	K. NORTH	No, walk-in patient	Positive
697	40	F	K. WEST	No, walk-in patient	Negative
698	23	M	K. WEST	No, walk-in patient	Negative
699	58	F	K. WEST	Yes	Negative
700	67	F	K. WEST	No, walk-in patient	Negative
701	21	F	K. NORTH	Yes	Negative
702	38	F	K. NORTH	Yes	Negative
703	11	M	K. NORTH	Yes	Negative
704	32	M	K. NORTH	Yes	Negative
705	36	F	K. NORTH	No, walk-in patient	Negative
706	25	M	K. WEST	No, walk-in patient	Positive
707	29	F	K. NORTH	No, walk-in patient	Positive
708	47	M	K. WEST	No, walk-in patient	Negative
709	26	M	K. WEST	No, walk-in patient	Negative
710	45	F	K. WEST	No, walk-in patient	Negative
711	13	M	K. WEST	No, walk-in patient	Negative
712	25	F	K. WEST	No, walk-in patient	Negative
713	52	F	K. EAST	Yes	Negative
714	65	F	K. EAST	Yes	Negative
715	29	F	K. NORTH	Yes	Negative
716	56	M	K. EAST	Yes	Negative
717	Unknown	F	K. EAST	Yes	Negative
718	32	F	K. EAST	Yes	Negative
719	Unknown	F	K. EAST	Yes	Negative
720	33	M	K. WEST	Yes	Invalid/Error
721	27	M	K. WEST	Yes	Negative
722	33	M	K. WEST	Yes	Negative
723	27	F	K. WEST	Yes	Negative
724	28	M	K. WEST	Yes	Negative
725	44	M	K. WEST	Yes	Negative
726	33	F	K. WEST	Yes	Negative
727	52	M	K. WEST	Yes	Negative
728	Unknown	M	K. WEST	Yes	Negative
729	22	M	K. WEST	Yes	Negative
730	18	F	K. WEST	Yes	Negative
731	60	F	Unknown	No, walk-in patient	Negative
732	26	M	K. NORTH	No, walk-in patient	Negative
733	36	F	K. EAST	Yes	Negative
734	17	M	K. WEST	Yes	Negative
735	22	F	K. WEST	No, walk-in patient	Negative
736	13	M	K. WEST	Yes	Negative
737	30	F	K. WEST	Yes	Negative
738	Unknown	M	K. WEST	Yes	Negative
739	Unknown	F	K. WEST	Yes	Negative
740	Unknown	F	K. WEST	Yes	Negative
741	75	F	K. NORTH	Yes	Negative
742	47	M	K. WEST	No, walk-in patient	Negative
743	30	F	K. WEST	No, walk-in patient	Negative
744	43	F	K. NORTH	Yes	Negative
745	54	M	K. NORTH	Yes	Negative
746	42	M	K. NORTH	Yes	Negative
747	61	M	K. NORTH	Yes	Negative
748	60	M	K. NORTH	Yes	Negative
749	27	M	K. NORTH	Yes	Negative
750	45	F	K. NORTH	Yes	Negative
751	68	M	K. WEST	No, walk-in patient	Negative
752	68	M	K. WEST	No, walk-in patient	Negative
753	25	F	K. WEST	No, walk-in patient	Negative
754	30	F	K. WEST	No, walk-in patient	Negative
755	11	M	K. WEST	No, walk-in patient	Negative
756	15	F	K. WEST	No, walk-in patient	Negative
757	40	F	K. WEST	No, walk-in patient	Negative
758	72	M	K. WEST	No, walk-in patient	Negative
759	10	F	K. WEST	No, walk-in patient	Negative
760	30	M	K. NORTH	Yes	Negative
761	38	F	K. NORTH	Yes	Negative
762	15	F	K. WEST	No, walk-in patient	Positive
763	33	F	K. NORTH	Yes	Positive
764	32	M	K. CENTRAL	Yes	Invalid/Error
765	72	F	K. CENTRAL	Yes	Negative
766	57	M	K. CENTRAL	Yes	Negative
767	20	M	K. CENTRAL	Yes	Negative
768	24	M	K. CENTRAL	Yes	Negative
769	46	M	K. CENTRAL	Yes	Negative
770	52	M	K. CENTRAL	Yes	Negative
771	52	M	K. CENTRAL	Yes	Negative
772	46	F	K. CENTRAL	Yes	Negative
773	59	M	K. NORTH	No, walk-in patient	Negative
774	53	M	K. NORTH	Yes	Negative
775	28	M	K. NORTH	Yes	Negative
776	64	M	K. WEST	No, walk-in patient	Negative
777	48	M	K. WEST	No, walk-in patient	Negative
778	41	M	K. NORTH	No, walk-in patient	Positive
779	27	F	K. WEST	No, walk-in patient	Positive
780	31	F	K. WEST	No, walk-in patient	Negative
781	32	M	K. WEST	No, walk-in patient	Negative
782	33	M	K. WEST	No, walk-in patient	Negative
783	66	M	K. WEST	No, walk-in patient	Negative
784	Unknown	F	K. WEST	No, walk-in patient	Negative
785	17	M	K. WEST	Yes	Negative
786	24	F	K. WEST	No, walk-in patient	Negative
787	76	F	K. WEST	No, walk-in patient	Negative
788	60	F	K. WEST	Yes	Invalid/Error
789	63	F	K. WEST	Yes	Negative
790	18	F	K. WEST	Yes	Negative
791	42	M	K. WEST	Yes	Negative
792	10	M	K. WEST	Yes	Negative
793	41	F	K. WEST	Yes	Negative
794	12	F	K. WEST	Yes	Negative
795	26	M	K. WEST	Yes	Negative
796	35	M	K. WEST	Yes	Positive
797	55	M	K. WEST	Yes	Positive
798	30	M	K. WEST	No, walk-in patient	Negative
799	24	F	K. WEST	No, walk-in patient	Negative
800	27	M	K. WEST	No, walk-in patient	Negative
801	20	F	K. WEST	No, walk-in patient	Negative
802	Unknown	F	K. WEST	No, walk-in patient	Negative
803	45	M	K. WEST	No, walk-in patient	Positive
804	60	M	K. WEST	No, walk-in patient	Negative
805	60	F	K. WEST	No, walk-in patient	Negative
806	30	M	Unknown	No, walk-in patient	Negative
807	45	F	K. WEST	No, walk-in patient	Negative
808	32	F	K. WEST	No, walk-in patient	Negative
809	50	M	K. WEST	No, walk-in patient	Negative
810	36	F	K. WEST	No, walk-in patient	Negative
811	10	M	K. WEST	No, walk-in patient	Negative
812	5	F	K. WEST	No, walk-in patient	Negative
813	21	M	K. WEST	Yes	Negative
814	60	F	K. WEST	Yes	Negative
815	13	F	K. WEST	No, walk-in patient	Positive
816	26	M	K. NORTH	Yes	Negative
817	30	M	K. NORTH	No, walk-in patient	Negative
818	17	F	K. NORTH	No, walk-in patient	Negative
819	63	M	K. NORTH	Yes	Negative
820	24	M	K. NORTH	Yes	Negative
821	48	M	K. NORTH	Yes	Negative
822	40	M	K. NORTH	Yes	Negative
823	42	F	K. NORTH	Yes	Invalid/Error
824	31	F	K. NORTH	Yes	Negative
825	Unknown	M	K. NORTH	Yes	Negative
826	23	M	K. NORTH	Yes	Negative
827	50	M	K. NORTH	Yes	Negative
828	30	M	K. NORTH	Yes	Positive
829	50	F	K. WEST	Yes	Invalid/Error
830	48	F	K. WEST	No, walk-in patient	Negative
831	45	F	K. WEST	No, walk-in patient	Negative
832	50	M	K. WEST	No, walk-in patient	Negative
833	38	M	K. WEST	Yes	Negative
834	12	M	K. WEST	Yes	Negative
835	Unknown	M	K. WEST	Yes	Negative
836	7	F	K. WEST	No, walk-in patient	Positive
837	35	M	K. WEST	No, walk-in patient	Positive
838	20	F	K. WEST	No, walk-in patient	Positive
839	44	M	K. WEST	No, walk-in patient	Negative
840	32	M	K. WEST	No, walk-in patient	Negative
841	27	F	K. WEST	No, walk-in patient	Positive
842	14	F	K. WEST	No, walk-in patient	Positive
843	20	F	K. NORTH	Yes	Positive
844	13	F	K. WEST	No, walk-in patient	Negative
845	Unknown	M	K. WEST	No, walk-in patient	Negative
846	44	F	K. WEST	No, walk-in patient	Negative
847	42	F	K. NORTH	Yes	Negative
848	23	M	K. WEST	No, walk-in patient	Negative
849	Unknown	M	K. WEST	No, walk-in patient	Negative
850	29	M	K. WEST	No, walk-in patient	Negative
851	25	M	K. WEST	No, walk-in patient	Negative
852	20	F	K. WEST	No, walk-in patient	Negative
853	65	M	K. WEST	No, walk-in patient	Negative
854	67	M	K. NORTH	Yes	Negative
855	26	M	K. EAST	Yes	Negative
856	36	M	K. EAST	Yes	Negative
857	24	M	K. EAST	Yes	Negative
858	37	M	K. EAST	Yes	Negative
859	34	M	K. EAST	Yes	Positive
860	30	F	K. WEST	No, walk-in patient	Negative
861	35	F	K. WEST	No, walk-in patient	Negative
862	50	F	K. WEST	No, walk-in patient	Negative
863	26	F	K. WEST	No, walk-in patient	Negative
864	34	M	K. EAST	Yes	Negative
865	25	M	K. EAST	Yes	Negative
866	38	M	K. EAST	Yes	Positive
867	41	M	K. NORTH	Yes	Positive
868	16	M	K. WEST	No, walk-in patient	Negative
869	13	F	K. WEST	No, walk-in patient	Negative
870	45	M	K. WEST	No, walk-in patient	Negative
871	14	F	K. WEST	No, walk-in patient	Negative
872	22	F	K. WEST	No, walk-in patient	Negative
873	23	F	K. WEST	No, walk-in patient	Negative
874	35	F	K. NORTH	Yes	Negative
875	22	F	K. NORTH	Yes	Negative
876	24	F	K. NORTH	Yes	Negative
877	46	F	K. NORTH	Yes	Negative
878	62	M	Unknown	No, walk-in patient	Negative
879	30	M	K. WEST	No, walk-in patient	Negative
880	52	F	K. WEST	No, walk-in patient	Negative
881	31	M	K. WEST	No, walk-in patient	Negative
882	21	F	K. WEST	No, walk-in patient	Negative
883	47	F	K. NORTH	No, walk-in patient	Negative
884	16	M	K. WEST	No, walk-in patient	Negative
885	18	F	K. WEST	No, walk-in patient	Negative
886	29	F	K. WEST	No, walk-in patient	Negative
887	34	F	K. WEST	No, walk-in patient	Negative
888	23	F	K. WEST	No, walk-in patient	Positive
889	22	M	K. WEST	No, walk-in patient	Negative
890	35	F	K. NORTH	No, walk-in patient	Negative
891	42	M	K. NORTH	No, walk-in patient	Positive
892	60	M	K. NORTH	No, walk-in patient	Negative
893	60	M	K. NORTH	No, walk-in patient	Negative
894	30	M	K. NORTH	No, walk-in patient	Negative
895	46	M	K. WEST	No, walk-in patient	Negative
896	22	F	K. WEST	No, walk-in patient	Negative
897	22	F	K. WEST	No, walk-in patient	Negative
898	33	M	K. NORTH	No, walk-in patient	Positive
899	45	M	K. WEST	No, walk-in patient	Positive
900	18	F	K. WEST	No, walk-in patient	Negative
901	50	M	K. NORTH	No, walk-in patient	Negative
902	80	F	K. WEST	No, walk-in patient	Invalid/Error
903	70	F	K. WEST	No, walk-in patient	Negative
904	30	F	K. WEST	No, walk-in patient	Negative
905	16	F	K. WEST	No, walk-in patient	Negative
906	40	M	K. NORTH	Yes	Negative
907	45	M	K. NORTH	Yes	Negative
908	35	M	K. WEST	No, walk-in patient	Positive
909	18	F	K. WEST	No, walk-in patient	Positive
910	16	F	K. WEST	No, walk-in patient	Positive
911	25	M	K. NORTH	Yes	Positive
912	46	F	K. WEST	No, walk-in patient	Negative
913	16	F	K. WEST	No, walk-in patient	Negative
914	30	M	K. WEST	No, walk-in patient	Negative
915	30	F	K. WEST	No, walk-in patient	Negative
916	12	F	K. WEST	No, walk-in patient	Negative
917	46	F	K. WEST	No, walk-in patient	Negative
918	42	M	K. NORTH	No, walk-in patient	Negative
919	35	M	K. NORTH	No, walk-in patient	Negative
920	30	F	K. WEST	No, walk-in patient	Negative
921	35	F	K. WEST	No, walk-in patient	Negative
922	80	M	K. NORTH	Yes	Negative
923	49	F	K. NORTH	Yes	Negative
924	8	M	K. WEST	No, walk-in patient	Negative
925	9	F	K. WEST	No, walk-in patient	Negative
926	29	F	K. NORTH	No, walk-in patient	Negative
927	57	F	K. WEST	No, walk-in patient	Negative
928	81	M	K. NORTH	Yes	Negative
929	39	F	K. NORTH	Yes	Negative
930	24	M	K. NORTH	No, walk-in patient	Negative
931	27	M	K. NORTH	No, walk-in patient	Negative
932	58	F	K. NORTH	No, walk-in patient	Negative
933	42	M	K. WEST	No, walk-in patient	Positive
934	50	M	K. WEST	No, walk-in patient	Negative
935	60	M	K. NORTH	Yes	Negative
936	38	F	K. NORTH	Yes	Negative
937	18	M	K. WEST	Yes	Negative
938	12	F	K. WEST	Yes	Negative
939	60	M	K. WEST	Yes	Negative
940	42	M	K. WEST	Yes	Negative
941	14	F	K. WEST	No, walk-in patient	Positive
942	60	M	K. WEST	No, walk-in patient	Positive
943	80	M	K. NORTH	No, walk-in patient	Negative
944	35	M	K. NORTH	No, walk-in patient	Negative
945	24	M	K. NORTH	No, walk-in patient	Negative
946	46	F	K. NORTH	No, walk-in patient	Negative
947	57	Unknown	K. WEST	No, walk-in patient	Negative
948	18	M	K. WEST	No, walk-in patient	Positive
949	70	Unknown	K. WEST	No, walk-in patient	Negative
950	19	Unknown	K. WEST	No, walk-in patient	Negative
951	16	Unknown	K. WEST	No, walk-in patient	Negative
952	44	Unknown	K. WEST	No, walk-in patient	Negative
953	7	Unknown	K. WEST	No, walk-in patient	Negative
954	13	Unknown	K. WEST	No, walk-in patient	Negative
955	12	Unknown	K. WEST	No, walk-in patient	Negative
956	Unknown	Unknown	K. WEST	No, walk-in patient	Negative
957	14	M	K. WEST	No, walk-in patient	Positive
958	46	Unknown	K. WEST	No, walk-in patient	Negative
959	70	Unknown	K. WEST	No, walk-in patient	Negative
960	56	Unknown	K. WEST	No, walk-in patient	Negative
961	35	Unknown	K. NORTH	No, walk-in patient	Invalid/Error
962	20	Unknown	K. WEST	No, walk-in patient	Negative
963	36	M	K. EAST	Yes	Invalid/Error
964	34	M	K. EAST	Yes	Invalid/Error
965	24	M	K. WEST	Yes	Positive
966	31	F	K. WEST	Yes	Negative
967	59	F	K. NORTH	No, walk-in patient	Negative
968	Unknown	M	K. WEST	Yes	Positive
969	Unknown	M	K. WEST	Yes	Positive

## Sheet: CONFIRMED CASES
Patient ID	Age (ys)	Sex (M/F)	Subcounty of origin	HIV coinfection	Identified by active case finding (ACF)	Rifampicin-resistance detected
1	70	F	K. EAST	Y	No, walk-in patient	N
2	58	M	K. WEST	Unknown	No, walk-in patient	N
3	34	F	K. WEST	N	No, walk-in patient	N
4	51	M	K. WEST	N	No, walk-in patient	N
5	74	M	K. EAST	Unknown	Yes	N
6	20	M	K. WEST	N	No, walk-in patient	N
7	21	M	K. WEST	N	No, walk-in patient	N
8	18	F	K. WEST	N	No, walk-in patient	N
9	35	F	K. WEST	Y	No, walk-in patient	N
10	18	F	K. WEST	Unknown	No, walk-in patient	N
11	34	F	K. WEST	Unknown	No, walk-in patient	N
12	25	F	K. WEST	Unknown	No, walk-in patient	N
13	30	M	K. WEST	Unknown	No, walk-in patient	N
14	13	F	K. NORTH	Unknown	Yes	N
15	29	M	K. NORTH	N	No, walk-in patient	N
16	26	M	K. WEST	N	Yes	N
17	65	F	K. WEST	N	No, walk-in patient	N
18	60	F	K. WEST	N	No, walk-in patient	N
19	22	F	K. CENTRAL	Unknown	Yes	N
20	61	M	K. CENTRAL	Unknown	Yes	N
21	34	M	K. WEST	N	No, walk-in patient	N
22	49	M	K. WEST	N	Yes	N
23	9	M	K. WEST	Unknown	No, walk-in patient	N
24	49	M	K. WEST	N	No, walk-in patient	N
25	34	F	K. NORTH	N	No, walk-in patient	N
26	43	M	K. EAST	Y	No, walk-in patient	N
27	56	M	K. WEST	N	No, walk-in patient	N
28	56	F	K. WEST	N	No, walk-in patient	Y
29	35	M	K. WEST	N	No, walk-in patient	N
30	45	F	K. WEST	Y	No, walk-in patient	N
31	26	M	K. WEST	N	No, walk-in patient	N
32	45	M	K. WEST	N	No, walk-in patient	N
33	28	F	K. NORTH	Unknown	Yes	N
34	34	M	K. WEST	Y	No, walk-in patient	N
35	32	M	K. WEST	Unknown	No, walk-in patient	N
36	32	M	K. NORTH	Y	No, walk-in patient	N
37	15	M	K. WEST	N	No, walk-in patient	N
38	33	M	K. NORTH	N	No, walk-in patient	N
39	23	M	K. NORTH	N	No, walk-in patient	N
40	25	M	K. WEST	N	No, walk-in patient	N
41	49	F	K. WEST	N	Yes	N
42	60	M	K. WEST	N	No, walk-in patient	N
43	41	F	K. WEST	Y	No, walk-in patient	N
44	25	M	K. NORTH	N	Yes	N
45	49	M	K. WEST	N	Yes	N
46	50	M	K. NORTH	Y	No, walk-in patient	N
47	24	M	K. WEST	Unknown	No, walk-in patient	N
48	48	M	K. WEST	Y	No, walk-in patient	N
49	25	M	K. WEST	Y	Yes	N
50	15	M	K. WEST	N	No, walk-in patient	N
51	21	F	K. WEST	N	No, walk-in patient	N
52	25	M	K. WEST	Unknown	No, walk-in patient	N
53	27	M	K. WEST	Unknown	No, walk-in patient	N
54	38	F	K. NORTH	Y	No, walk-in patient	N
55	29	F	K. NORTH	N	No, walk-in patient	N
56	33	F	K. NORTH	Unknown	Yes	N
57	15	F	K. WEST	N	No, walk-in patient	N
58	41	M	K. NORTH	Unknown	No, walk-in patient	N
59	27	F	K. WEST	N	No, walk-in patient	N
60	55	M	K. WEST	N	Yes	N
61	35	M	K. WEST	Y	Yes	N
62	45	M	K. WEST	N	No, walk-in patient	N
63	30	M	K. NORTH	N	Yes	N
64	13	F	K. WEST	Unknown	No, walk-in patient	N
65	7	F	K. WEST	N	No, walk-in patient	N
66	35	M	K. WEST	N	No, walk-in patient	N
67	20	F	K. WEST	N	No, walk-in patient	N
68	20	F	K. NORTH	N	Yes	N
69	27	F	K. WEST	N	No, walk-in patient	N
70	14	F	K. WEST	N	No, walk-in patient	Y
71	34	M	K. EAST	N	Yes	N
72	41	M	K. NORTH	Unknown	Yes	N
73	38	M	K. EAST	N	Yes	N
74	23	F	K. WEST	Y	No, walk-in patient	Unable to be evaluated
75	42	M	K. NORTH	N	No, walk-in patient	N
76	33	M	K. NORTH	N	No, walk-in patient	N
77	45	M	K. WEST	Unknown	No, walk-in patient	N
78	35	M	K. WEST	Unknown	No, walk-in patient	N
79	18	F	K. WEST	N	No, walk-in patient	N
80	16	F	K. WEST	N	No, walk-in patient	Unable to be evaluated
81	25	M	K. NORTH	Unknown	Yes	N
82	42	M	K. WEST	Y	No, walk-in patient	N
83	14	F	K. WEST	N	No, walk-in patient	N
84	60	M	K. WEST	N	No, walk-in patient	Y
85	Unknown	M	K. WEST	Unknown	Yes	N
86	Unknown	M	K. WEST	Unknown	Yes	Y
87	18	M	K. WEST	N	No, walk-in patient	N
88	14	M	K. WEST	Unknown	No, walk-in patient	N
89	24	M	K. WEST	Unknown	Yes	N
